# Supplementary material for: Channel Selection of Closed-Loop Supply Chain for Scrapped Agricultural Machines Remanufacturing
Source: MDPI journal article supplement (doi:10.3390/su15065337), 2023-03-17
Supplement: s1 [file s1]

The Matlab code for applicable conditions of the SMM and SDM models (Figure 6.a)

F=0:4:200;

PN1=(B+C.\*CMN)./(2.\*C);

PR1=(2.\*D.\*PN1-(A+E).\*QM+U.\*QM.\*((CMN-NM.\*QM).\*QM+CRM-F1-F2.\*QM))./(2.\*D+U.\*QM.^2);

PRR1=(D\*(PN1-PR1)./(U\*QM))-((A+E)./U);

I1=(PN1-CMN).\*(-C.\*PN1+B)+(QM.\*(PR1-CMN+NM.\*QM)-(PRR1+CRM)+F1+F2.\*QM).\*(A+U.\*PRR1+E)-CM1-CM2-CM3-CR1-CR2+0.\*F;

I2=0.\*F;

I=I1;

PN2=(B+C.\*CMN)./(2.\*C);

PR2=(2.\*D.\*PN2-(A+E).\*QD+U.\*QD.\*((CMN-NM.\*QD).\*QD+F-F1-F2.\*QD))./(2.\*D+U.\*QD.^2);

PRR2=D.\*(PN2-PR2)./(U.\*QD)-(A+E)./U;

II1=(PN2-CMN).\*(-C.\*PN2+B)+(QD.\*(PR2-CMN+NM.\*QD)-(PRR2+F)+F1+F2.\*QD).\*(A+U.\*PRR2+E)-CM1-CM3-CR1-CR2;

II2=(F-CRD).\*(A+U.\*PRR2+E)-CD1;

II=II1+II2;

```
set(gcf,'color','white')  
plot(F,I1,'k-','LineWidth',2.5)  
hold on  
plot(F,I2,'b:','LineWidth',2.5)  
plot(F,I1,'c:','LineWidth',2.5)  
plot(F,I2,'m-','LineWidth',2.5)  
plot(F,I,'k-','LineWidth',2.5)
```
